# Supplementary material
Source: PubMed Central journal article supplement (PMC3155178)
Supplement: mmc1.pdf [file mmc1.pdf]

**American Journal of Human Genetics, Volume 89**

**Supplemental Data**

**Why Boys Will Be Boys: Two Pathways  
of Fetal Testicular Androgen Biosynthesis**

**Are Needed for Male Sexual Differentiation**

**Christa E. Flück, Monika Meyer-Böni, Amit V. Pandey, Petra Kempná, Walter L. Miller, Eugen J. Schoenle, and Anna Bignon-Laubert**

Figure S1.

### Genome-wide microsatellite analysis

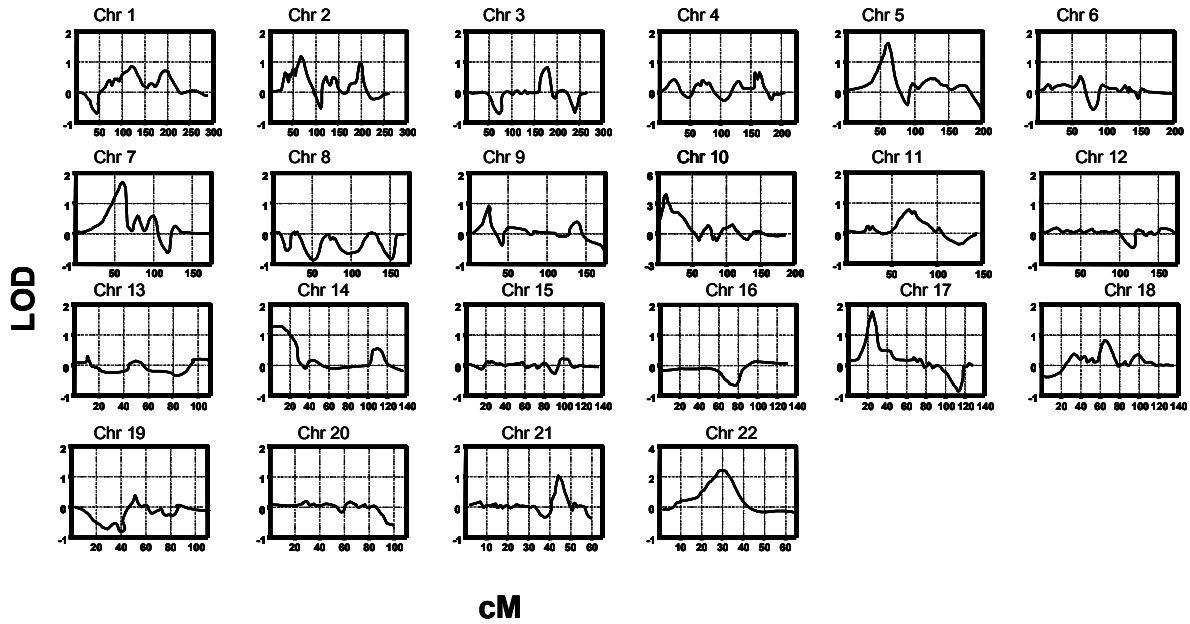

The LOD score in genome-wide linkage analysis using 811 microsatellite markers covering 22 chromosomes in family A with DSD. Each box represents a chromosome. The x axis gives the genetic distance in cM, and the y axis gives the LOD scores

### Chr.10 microsatellite analysis

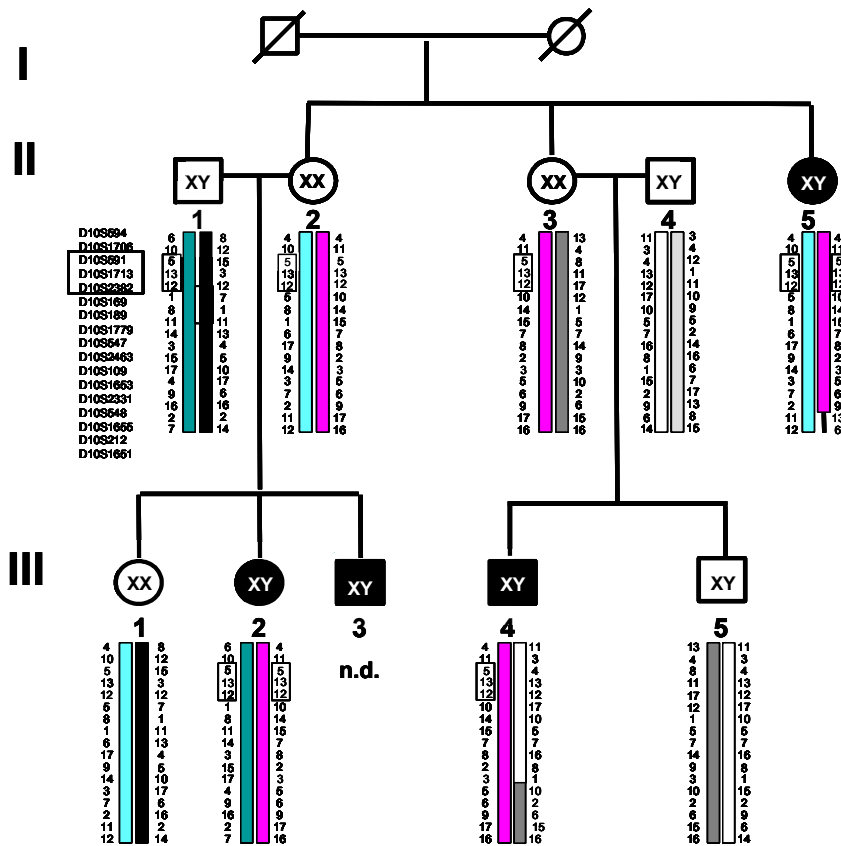

Figure S2

Primary sequence alignment of human AKR1C1-4

```

                20                40                60
AK1C1_HUMAN  MDSKYQCVKL  NDGHFMPVLG  FGTYAPAEVVP  KSKALEATKL  AIEAGFRHID  SAHLYNNEEEQ  60
AK1C2_HUMAN  MDSKYQCVKL  NDGHFMPVLG  FGTYAPAEVVP  KSKALEAVKL  AIEAGFHHID  SAHVYNNEEQ  60
AK1C3_HUMAN  MDSKHQCVKL  NDGHFMPVLG  FGTYAPEVP  RSKALEVTKL  AIEAGFRHID  SAHLYNNEEEQ  60
AK1C4_HUMAN  MDPKYQRVEL  NDGHFMPVLG  FGTYAPEVP  RNRAVEVTKL  AIEAGFRHID  SAYLYNNEEEQ  60

                80                100               120
AK1C1_HUMAN  VGLAIRSKIA  DGSVKREDIF  YTSKLWCNSH  RPELVRPALE  RSLKNLQLDY  VDLYLIHFPV  120
AK1C2_HUMAN  VGLAIRSKIA  DGSVKREDIF  YTSKLWSNSH  RPELVRPALE  RSLKNLQLDY  VDLYLIHFPV  120
AK1C3_HUMAN  VGLAIRSKIA  DGSVKREDIF  YTSKLWSTFH  RPELVRPALE  NSLKKAQLDY  VDLYLIHSPM  120
AK1C4_HUMAN  VGLAIRSKIA  DGSVKREDIF  YTSKLWCTFF  QPQMVQPALE  SSLKKLQLDY  VDLYLLHFPM  120

                140               160               180
AK1C1_HUMAN  SVKPGEEVIP  KDENGKILFD  TVDLCATWEA  VEKCKDAGLA  KSIGVSNFNR  RQLEMILNKP  180
AK1C2_HUMAN  SVKPGEEVIP  KDENGKILFD  TVDLCATWEA  MEKCKDAGLA  KSIGVSNFNH  RLLEMILNKP  180
AK1C3_HUMAN  SLKPGEELSP  TDENGKVIFD  IVDLCTTWEA  MEKCKDAGLA  KSIGVSNFNR  RQLEMILNKP  180
AK1C4_HUMAN  ALKPGETPLP  KDENGKVIFD  TVDLSATWEV  MEKCKDAGLA  KSIGVSNFNC  RQLEMILNKP  180

                200               220               240
AK1C1_HUMAN  GLKYKPVCNQ  VECHPYFNQR  KLLDFCKSKD  IVLVAYSALG  SHREEPWVDP  NSPVLLEDPV  240
AK1C2_HUMAN  GLKYKPVCNQ  VECHPYFNQR  KLLDFCKSKD  IVLVAYSALG  SHREEPWVDP  NSPVLLEDPV  240
AK1C3_HUMAN  GLKYKPVCNQ  VECHPYFNRS  KLLDFCKSKD  IVLVAYSALG  SQRDKRWVDP  NSPVLLEDPV  240
AK1C4_HUMAN  GLKYKPVCNQ  VECHPYLNQS  KLLDFCKSKD  IVLVAHSALG  TQRHKLWVDP  NSPVLLEDPV  240

                260               280               300
AK1C1_HUMAN  LCALAKKHKR  TPALIALRYQ  LQRGVVVLAK  SYNEQRIRQN  VQVFEFQLTS  EEMKAIDGLN  300
AK1C2_HUMAN  LCALAKKHKR  TPALIALRYQ  LQRGVVVLAK  SYNEQRIRQN  VQVFEFQLTS  EEMKAIDGLN  300
AK1C3_HUMAN  LCALAKKHKR  TPALIALRYQ  LQRGVVVLAK  SYNEQRIRQN  VQVFEFQLTA  EDMKAIDGLD  300
AK1C4_HUMAN  LCALAKKHKQ  TPALIALRYQ  LQRGVVVLAK  SYNEQRIREN  IQVFEFQLTS  EDMKVLDGLN  300

                320
AK1C1_HUMAN  RNVRYLTLDI  FAGPPNYPFS  DEY  323
AK1C2_HUMAN  RNVRYLTLDI  FAGPPNYPFS  DEY  323
AK1C3_HUMAN  RNLHYFNSDS  FASHPNYPYS  DEY  323
AK1C4_HUMAN  RNYRYVVMDF  LMDHPDYPFS  DEY  323

```

**Table S1-** Phenotypical features of 46, XY DSD individuals (ref.17 and this work)

| Family | Subject | External genitalia     | Sex of rearing | Uterus                      | Gonads                                         | Other                            |
|--------|---------|------------------------|----------------|-----------------------------|------------------------------------------------|----------------------------------|
| 1      | II.5    | Ambiguous (Prader II)  | Female         | Absent (primary amenorrhea) | 1 Abdominal Testis/ 1 Testis in inguinal canal | Final height 188 cm (MPH 176 cm) |
| 1      | III.2   | Female                 | Female         | Absent (primary amenorrhea) | Abdominal Testes                               | Adult BMI: 32                    |
| 1      | III.3   | Ambiguous (Prader III) | Male           | Absent                      | Testes in inguinal canal                       |                                  |
| 1      | III.4   | Ambiguous (Prader III) | Male           | Absent                      | Testes in inguinal canal                       |                                  |
| 2      | patient | Female                 | Female         | Absent                      | Testes in inguinal canal                       |                                  |

**Table S2.** Primers for PCR amplification and sequencing of the coding sequences of *AKR1C2* (based on reference sequences NC 000010.10 5042103-5046053)

| Exon | Primer sequences (5' to 3') |                       |
|------|-----------------------------|-----------------------|
| 3    | Fwd                         | CCCTGTGACAAGACGGCATT  |
|      | Rev                         | CGGAAGAAACATTTGCTAAC  |
| 4    | Fwd                         | AGACTGGGATGGGCTTATGA  |
|      | Rev                         | TGCCACCTCCACACAATCAC  |
| 5    | Fwd                         | AGTGAGTATAAAAGAGTGATA |
|      | Rev                         | CTTTCTGTTCCATAGAAAGG  |
| 6    | Fwd                         | ATGGTATTTTATTTACACATA |
|      | Rev                         | GGTGCATTTTCCATACTTGT  |
| 7    | Fwd                         | CAGTCGACTACACAAATGAT  |
|      | Rev                         | GATACTTGCCAATAGGACA   |
| 8    | Fwd                         | TTTGGTGATTTTAATATTAA  |
|      | Rev                         | ATTTTTTTTATCAAACCAG   |
| 9    | Fwd                         | GGACCCGCGTCACAAAGT    |
|      | Rev                         | TAGAGGGATATGGATATCAC  |
| 10   | Fwd                         | GGTCTTCTAGGTACATGG    |
|      | Rev                         | ATTTGGCTCATGGGCAAAC   |
| 11   | Fwd                         | TTGACAGATGTGGGATCTG   |
|      | Rev                         | TTTTCCGGCCGATGGGCTTA  |

*AKR1C1*-specific Fwd primer (Patient Family 2) 5' to 3'  
CAGAAATGGATTTCGAAATAT

**Table S3. Oligonucleotides used for site-directed mutagenesis**

|                  |                                                                      |             |
|------------------|----------------------------------------------------------------------|-------------|
| <b>Ile79Val</b>  | 5'-AGT GTG AAG AGA GAA GAC <b>GTA</b> TTC TAC ACT TCA AAG<br>CT-3'   | NM_1354     |
| <b>His90Gln</b>  | 5'-TT TGG AGC AAT TCC <b>CAG</b> CGA CCA GAG TTG GTC C-3'            | NM_205845.1 |
| <b>Asn300Thr</b> | 5-G AAA GCC ATA GAT GGC CTA <b>ACC</b> AGA AAT GTG CGA<br>TAT TTG-3' | NM_1354     |
| <b>His222Gln</b> | 5'- TAT AGT GCT CTG GGA TCC <b>CAG</b> CGA GAA GAA CCA<br>TGG GT-3'  | NM_1354     |

Note: Mutated nucleotides are given in bold, affected codons are underlined

**Table S4. qRT-PCR primers**

| <b>Target</b> | <b>Primer (5' to 3')</b>                                    |
|---------------|-------------------------------------------------------------|
| AKR1C1        | Fwd TAAAAGTAAAGCTTTAGAGGCCAC<br>Rev CGATGGGAATTGCACCAAAGCTT |
| AKR1C2        | Fwd TAAAAGTAAAGCTCTAGAGGCCGT<br>Rev CGATGGGAATTGCTCCAAAGCTT |
| AKR1C3        | Fwd AAGAAGTAAAGCTTTGGAGGTCACA<br>Rev CGATGAAAAGTGGACCAAAGCT |
| AKR1C4        | Fwd GAGGAACAGAGCTGTAGAGGTCACC<br>Rev TGAAAGAAAGTGCACCAAAGCT |
| AKR1CL1       | Fwd GCCACCAAAGTGGCTATTGA<br>Rev CGATCTTCTCCCAAATGGCC        |
| SRD5A1        | Fwd TCTACCAGTACGCCAGCGAGT<br>Rev TTTGCAAATAGCCGTTACAG       |
| SRD5A2        | Fwd CGGGGATCCTCGCCCGGCAGCC<br>Rev CTTGAAGGACTCCATTTCCA      |
| RoDH          | Fwd TGAGCCACCTCCAAGACAAG<br>Rev AGCCTGTCAGACGTCTGGCC        |
